# Supplementary material
Source: publisher figshare collection journal article supplement (https://acs.figshare.com/ndownloader/files/15017204)
Supplement: Supplementary file 1 [file 15017204]

## Supporting Information

# Suppression of Monoclinic Phase Transitions of O3-Type Cathodes Based on Electronic Delocalization for Na-Ion Batteries

*Hu-Rong Yao,<sup>†,‡,//</sup> Wei-Jun Lv,<sup>†,//</sup> Ya-Xia Yin,<sup>‡,⊥</sup> Huan Ye,<sup>‡</sup> Xiong-Wei Wu,<sup>‡</sup> Yi Wang,<sup>§,⊥</sup> Yue Gong,<sup>§,⊥</sup> Qinghao Li,<sup>§,⊥</sup> Xiqian Yu,<sup>§,⊥</sup> Lin Gu,<sup>§,⊥</sup> Zhigao Huang,<sup>\*,†,//</sup> Yu-Guo Guo<sup>\*,‡,⊥</sup>*

<sup>†</sup>Fujian Provincial Key Laboratory of Quantum Manipulation and New Energy Materials  
College of Physics and Energy, Fujian Normal University, Fuzhou 350117, China

<sup>‡</sup>CAS Key Laboratory of Molecular Nanostructure and Nanotechnology, CAS  
Research/Education Center for Excellence in Molecular Sciences, Beijing National Laboratory  
for Molecular Sciences (BNLMS), Institute of Chemistry, Chinese Academy of Sciences  
(CAS), Beijing 100190, P. R. China.

<sup>§</sup>Beijing National Laboratory for Condensed Matter Physics, Institute of Physics, Chinese  
Academy of Sciences, Beijing 100190, China

<sup>//</sup> Fujian Provincial Collaborative Innovation Center for Optoelectronic Semiconductors and  
Efficient Devices, Xiamen, 361005, China

<sup>⊥</sup>University of Chinese Academy of Sciences, Beijing 100049, China

<sup>\*</sup>To whom correspondence should be addressed. E-mail address: ygguo@iccas.ac.cn (Y.-G. G.); zghuang@fjnu.edu.cn (Z.-G. H.).

## EXPERIMENTAL SECTION

**DFT calculations.** To simulate the impacts of incorporated  $\text{Fe}^{3+}$  on crystal and electronic structure of  $\text{NaNi}_{0.5}\text{Mn}_{0.5}\text{O}_2$ , the DFT calculations were carried out with the projector augmented wave (PAW) methods utilized by the Vienna ab initio simulation package (VASP). The generalized gradient approximation (GGA) of Perdew–Burke–Ernzerhof with the GGA+U extension was used to describe electron exchange and correlation. The U value for Fe, Ni and Mn were 4.5, 6.1 and 4.0 eV respectively. All simulations used a plane wave energy cutoff of 520 eV, the Monkhorst-Pack scheme  $k$ -mesh was denser than  $0.03 \text{ \AA}^{-1}$ . The relaxations were converged to within a force convergence criterion of  $0.01 \text{ eV \AA}^{-1}$ . The  $\text{NaNi}_{0.5}\text{Mn}_{0.5}\text{O}_2$  structural model of  $6a \times 3b \times 1c$  supercell containing 216 atoms was used. To simulate bulk structure of Fe dopant, nine of Ni and Mn ions were substituted with Fe ions respectively.

**Synthesis.** The  $\text{O3-NaFe}_x\text{Ni}_{0.5-x/2}\text{Mn}_{0.5-x/2}\text{O}_2$  ( $x = 0, 0.3$ ) samples were easily prepared using solid-state reaction using  $\text{Na}_2\text{CO}_3$  (Alfa Aesar, 99.5%),  $\text{Fe}_2\text{O}_3$  (Alfa Aesar, 99.9%), NiO (Alfa Aesar, 99.0%) and  $\text{Mn}_2\text{O}_3$  (Alfa Aesar, 98.0%). Firstly, the stoichiometric precursors (access 5mol% of  $\text{Na}_2\text{CO}_3$ ) were ground in a mortar, then compacted at 10 MPa pressure load. The mixtures were calcined at  $1000^\circ\text{C}$  for 15 h in air to obtain the target materials.

**Characterizations.** The morphologies were investigated through SEM measurements performed on JEOL 6701F apparatus operated at 10 kV and EDS measurement using JEM 2100F equipment. The XRD profiles were collected on Bruker D8 advance diffractometer with  $\text{Cu K}\alpha$  radiation and the crystal structures of samples were carried out using TOPAS software.

The in-situ XRD patterns were obtained equipped with a special battery using Al foil as current collector and window for X-ray. The ABF-STEM images was executed with a JEM-ARM200CF (JEOL, Tokyo, Japan) equipped with cold emission gun and double hexapole Cs corrector (CEOS GmbH, Heidelberg, Germany), operated at 200 kV.

**Electrochemistry.** The electrochemical performances were obtained with Na half-cells. The working electrodes were fabricated by preparing the slurry with active material, Super P and poly(vinyl difluoride) (PVDF) in a mass ratio of 7:2:1 spread on Al current collector dried under vacuum for one night, and then cut into small rounds of 1 cm diameter. For assembling the coin-type cells, the electrodes were transferred into the Ar-filled glove box, and the used electrolyte was 1 M NaClO<sub>4</sub> in propylene carbonate (PC, 5% FEC). The galvanostatic charge/discharge profiles were obtained on Land BT2000 within 2.0–4.0 V voltage range. The results of CV measurement were collected on an Autolab PG302N equipment. The apparent diffusion coefficient can be calculated from the  $v^{1/2}$ -dependent  $I_p$  function.

$$I_p = 0.4463n^{3/2}F^{3/2}CSR^{-1/2}T^{-1/2}D^{1/2}v^{1/2}$$

Where  $I_p$  is peak current,  $n$  is charge transfer number during the reaction,  $F$  is the Faraday constant,  $C$  is the Na<sup>+</sup> concentration extracted from electrodes,  $S$  is electrode area,  $R$  is the gas constant,  $T$  is absolute temperature,  $D$  is Na<sup>+</sup> apparent diffusion coefficient,  $v$  is scan rate.

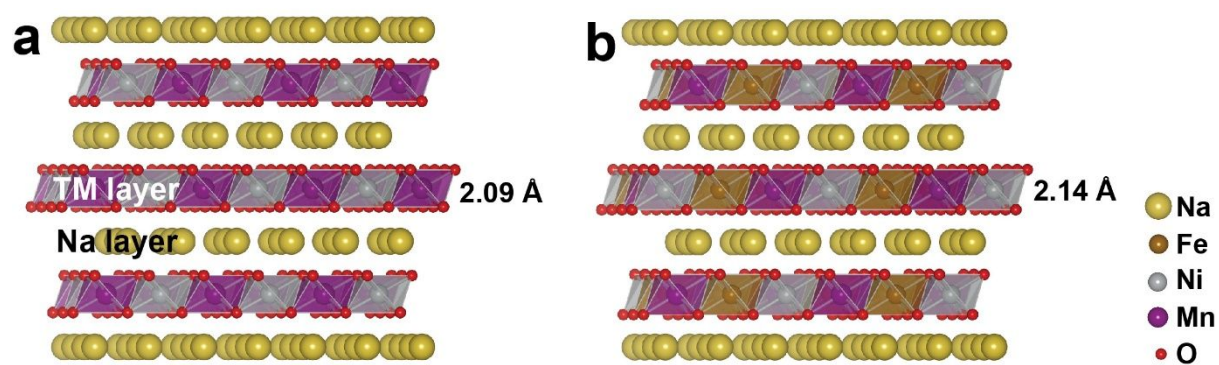

**Figure S1.** Calculated crystal structures of (a)  $\text{NaNi}_{0.5}\text{Mn}_{0.5}\text{O}_2$  and (b)  $\text{NaFe}_{0.3}\text{Ni}_{0.35}\text{Mn}_{0.35}\text{O}_2$ .

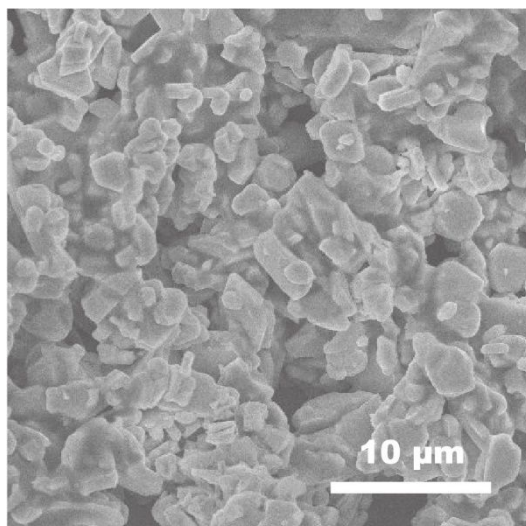

**Figure S2.** (a) SEM image of NaFe<sub>0.3</sub>Ni<sub>0.35</sub>Mn<sub>0.35</sub>O<sub>2</sub>.

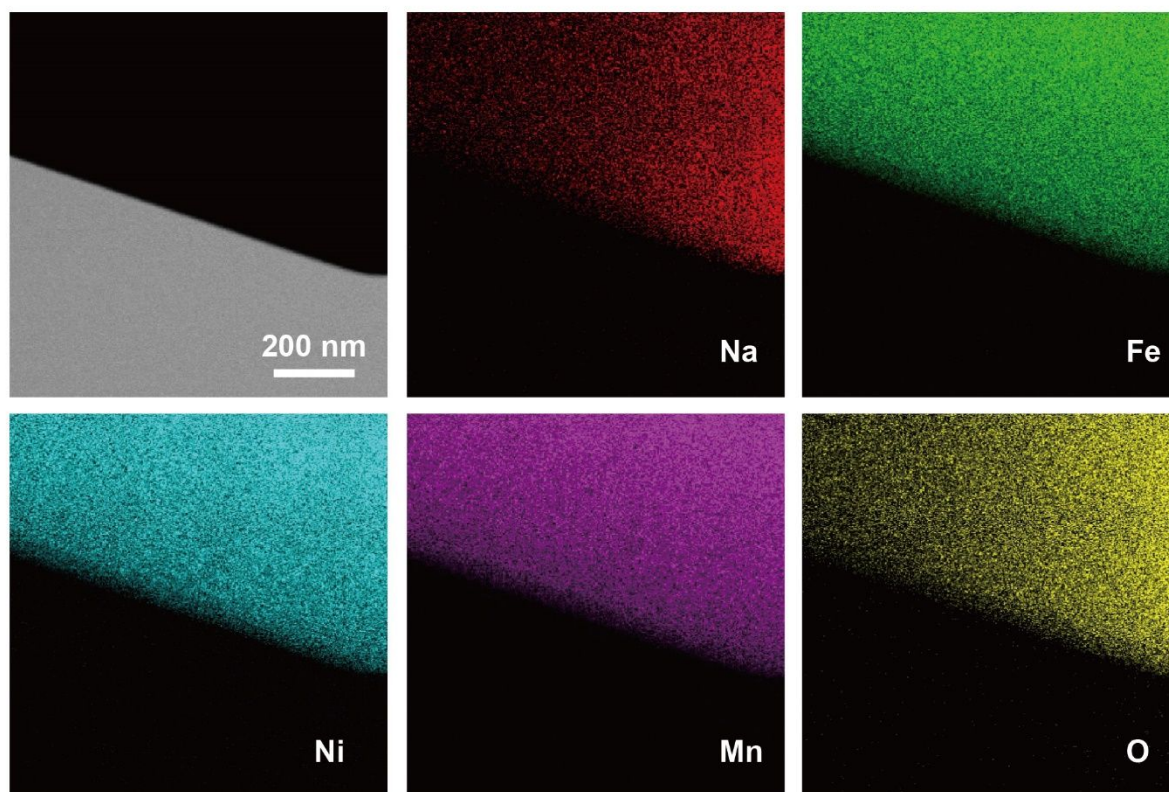

**Figure S3.** EDS analysis for  $\text{NaFe}_{0.3}\text{Ni}_{0.35}\text{Mn}_{0.35}\text{O}_2$ .

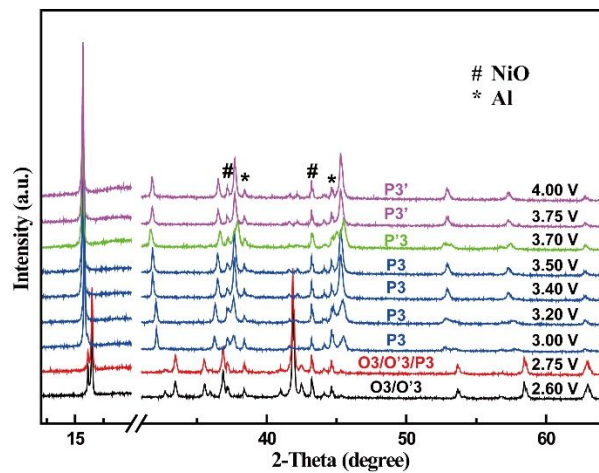

**Figure S4.** The ex-situ XRD patterns of  $\text{NaNi}_{0.5}\text{Mn}_{0.5}\text{O}_2$  electrodes at various charge states.

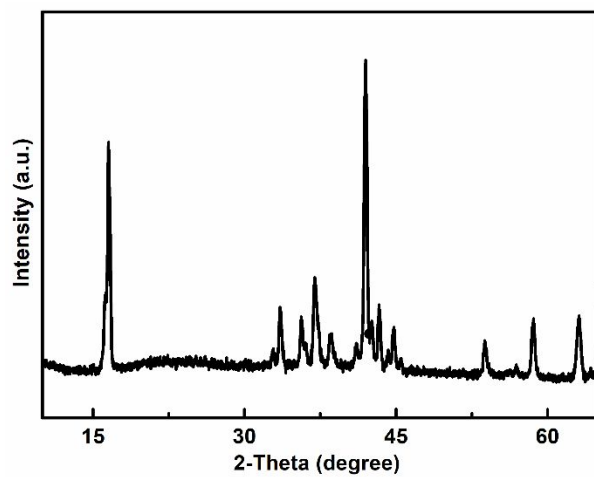

**Figure S5.** The XRD pattern of  $\text{NaNi}_{0.5}\text{Mn}_{0.5}\text{O}_2$  electrode after cycled 10 times.



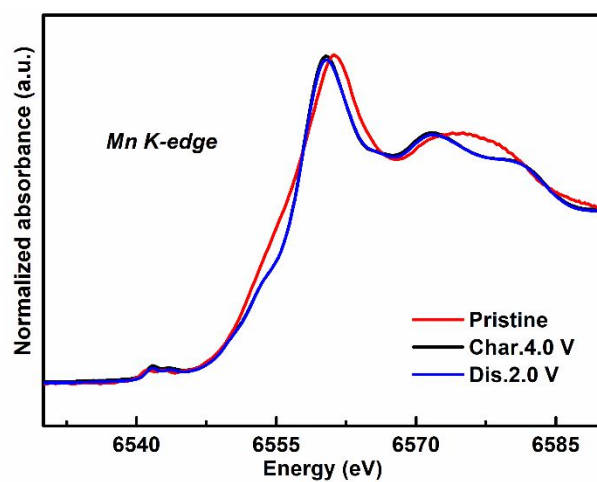

**Figure S6.** XANES data at the Mn *K*-edge of NaFe<sub>0.3</sub>Ni<sub>0.35</sub>Mn<sub>0.35</sub>O<sub>2</sub> recorded under various electrochemical states.

**Table S1.** Refined crystallographic parameters of O3-  $\text{NaNi}_{0.5}\text{Mn}_{0.5}\text{O}_2$ .

| Space group                                                                          |      | R-3m (No. 166) |   |        |      |
|--------------------------------------------------------------------------------------|------|----------------|---|--------|------|
| Atom                                                                                 | site | x              | y | z      | occ  |
| Na                                                                                   | 3a   | 0              | 0 | 0      | 1.00 |
| Ni                                                                                   | 3b   | 0              | 0 | 0.5    | 0.50 |
| Mn                                                                                   | 3b   | 0              | 0 | 0.5    | 0.50 |
| O                                                                                    | 6c   | 0              | 0 | 0.2249 | 1.00 |
| a = 2.9481(8) Å    c = 16.0497(7) Å $R_p = 5.10\%$ $R_{wp} = 6.99\%$ (NiO)Wt% = 7.5% |      |                |   |        |      |

**Table S2.** Refined crystallographic parameters of O3-  $\text{NaFe}_{0.3}\text{Ni}_{0.35}\text{Mn}_{0.35}\text{O}_2$ .

| Space group                                                                          |      | R-3m (No. 166) |   |        |      |
|--------------------------------------------------------------------------------------|------|----------------|---|--------|------|
| Atom                                                                                 | site | x              | y | z      | occ  |
| Na                                                                                   | 3a   | 0              | 0 | 0      | 1.00 |
| Fe                                                                                   | 3b   | 0              | 0 | 0.5    | 0.30 |
| Ni                                                                                   | 3b   | 0              | 0 | 0.5    | 0.35 |
| Mn                                                                                   | 3b   | 0              | 0 | 0.5    | 0.35 |
| O                                                                                    | 6c   | 0              | 0 | 0.2303 | 1.00 |
| a = 2.9787(0) Å    c = 16.0094(0) Å $R_p = 5.35\%$ $R_{wp} = 7.03\%$ (NiO)Wt% = 1.2% |      |                |   |        |      |
